# Supplementary material for: Polymorphism of 16s rRNA Gene: Any Effect on the Biomolecular Quantitation of the Honey Bee (Apis mellifera L., 1758) Pathogen Nosema ceranae?
Source: MDPI journal article supplement (doi:10.3390/app12010422), 2022-01-02
Supplement: s1 [file s1]

**Supplementary Table S1.** Detailed information for all samples in this study: honey bee ID. number of copies detected in each replicate for each target gene (*Hsp70* and *16srRNA*).

| Observation | Honey bee ID | <i>Hsp70</i> (Replicate 1) | <i>Hsp70</i> (Replicate 2) | <i>16S rRNA</i> (Replicate 1) | <i>16S rRNA</i> (Replicate 2) | <i>Hsp70</i> average | <i>16S rRNA</i> average | <i>16S rRNA/Hsp70</i> |
|-------------|--------------|----------------------------|----------------------------|-------------------------------|-------------------------------|----------------------|-------------------------|-----------------------|
| 1           | 1E06C1       | 191000                     | 196000                     | 2251000                       | 2340000                       | 193500               | 2295500                 | 11.9                  |
| 2           | 1E06C2       | 176000                     | 181000                     | 2110000                       | 2200000                       | 178500               | 2155000                 | 12.1                  |
| 3           | 1E06C3       | 189000                     | 188000                     | 2400000                       | 2350000                       | 188500               | 2375000                 | 12.6                  |
| 4           | 1E06C4       | 187000                     | 188000                     | 2330000                       | 2340000                       | 187500               | 2335000                 | 12.5                  |
| 5           | 1E06C5       | 173200                     | 173900                     | 2190000                       | 2200000                       | 173550               | 2195000                 | 12.6                  |
| 6           | 1E08C1       | 341000                     | 331000                     | 2790000                       | 2794000                       | 336000               | 2792000                 | 8.3                   |
| 7           | 1E08C2       | 335100                     | 335000                     | 2630000                       | 2635000                       | 335050               | 2632500                 | 7.9                   |
| 8           | 1E08C3       | 314500                     | 321000                     | 2981000                       | 2992000                       | 317750               | 2986500                 | 9.4                   |
| 9           | 1E08C4       | 309000                     | 307700                     | 2850000                       | 2799000                       | 308350               | 2824500                 | 9.2                   |
| 10          | 1E08C5       | 335000                     | 331000                     | 2792000                       | 2795000                       | 333000               | 2793500                 | 8.4                   |
| 11          | 1E10C1       | 402000                     | 400000                     | 3567000                       | 3670000                       | 401000               | 3618500                 | 9.0                   |
| 12          | 1E10C2       | 391000                     | 391000                     | 3440000                       | 3550000                       | 391000               | 3495000                 | 8.9                   |
| 13          | 1E10C3       | 399000                     | 391000                     | 3580000                       | 3610000                       | 395000               | 3595000                 | 9.1                   |
| 14          | 1E10C4       | 419000                     | 421000                     | 3912000                       | 3987000                       | 420000               | 3949500                 | 9.4                   |
| 15          | 1E10C5       | 375000                     | 383000                     | 3810000                       | 3860000                       | 379000               | 3835000                 | 10.1                  |
| 16          | 1E13C1       | 423000                     | 427000                     | 4216000                       | 4199000                       | 425000               | 4207500                 | 9.9                   |
| 17          | 1E13C2       | 459000                     | 461000                     | 4356000                       | 4369000                       | 460000               | 4362500                 | 9.5                   |
| 18          | 1E13C3       | 432000                     | 440000                     | 4560000                       | 4520000                       | 436000               | 4540000                 | 10.4                  |
| 19          | 1E13C4       | 461000                     | 459000                     | 4465000                       | 4479000                       | 460000               | 4472000                 | 9.7                   |
| 20          | 1E13C5       | 472000                     | 474000                     | 4579000                       | 4620000                       | 473000               | 4599500                 | 9.7                   |
| 21          | 1E15C1       | 462000                     | 457000                     | 4476000                       | 4491000                       | 459500               | 4483500                 | 9.8                   |
| 22          | 1A06C1       | 183000                     | 179000                     | 2510000                       | 2510000                       | 181000               | 2510000                 | 13.9                  |
| 23          | 1A06C2       | 176000                     | 181000                     | 2390000                       | 3410000                       | 178500               | 2900000                 | 16.2                  |
| 24          | 1A06C3       | 173200                     | 174000                     | 2230000                       | 2250000                       | 173600               | 2240000                 | 12.9                  |
| 25          | 1A06C4       | 187000                     | 183000                     | 2580000                       | 2580000                       | 185000               | 2580000                 | 13.9                  |
| 26          | 1A06C5       | 169000                     | 173000                     | 2010000                       | 2130000                       | 171000               | 2070000                 | 12.1                  |
| 27          | 1A08C1       | 187000                     | 183000                     | 2290000                       | 2310000                       | 185000               | 2300000                 | 12.4                  |

|    |        |        |        |         |         |        |         |      |
|----|--------|--------|--------|---------|---------|--------|---------|------|
| 28 | 1A08C2 | 179000 | 176000 | 1890000 | 1910000 | 177500 | 1900000 | 10.7 |
| 29 | 1A08C3 | 173000 | 175000 | 2100000 | 2500000 | 174000 | 2300000 | 13.2 |
| 30 | 1A08C4 | 181000 | 174000 | 1970000 | 1990000 | 177500 | 1980000 | 11.2 |
| 31 | 1A08C5 | 176000 | 173000 | 1830000 | 1860000 | 174500 | 1845000 | 10.6 |
| 32 | 1A10C1 | 163000 | 165000 | 1730000 | 1740000 | 164000 | 1735000 | 10.6 |
| 33 | 1A10C2 | 159000 | 161000 | 1820000 | 1840000 | 160000 | 1830000 | 11.4 |
| 34 | 1A10C3 | 163000 | 159000 | 1670000 | 1710000 | 161000 | 1690000 | 10.5 |
| 35 | 1A10C4 | 156000 | 157000 | 1720000 | 1720000 | 156500 | 1720000 | 11.0 |
| 36 | 1A10C5 | 161000 | 162000 | 1690000 | 1680000 | 161500 | 1685000 | 10.4 |
| 37 | 1A13C1 | 102000 | 106000 | 1210000 | 1190000 | 104000 | 1200000 | 11.5 |
| 38 | 1A13C2 | 99000  | 95000  | 112000  | 112000  | 97000  | 112000  | 1.2  |
| 39 | 1A13C3 | 96000  | 97000  | 106000  | 106000  | 96500  | 106000  | 1.1  |
| 40 | 1B06C1 | 169000 | 168000 | 1760000 | 1770000 | 168500 | 1765000 | 10.5 |
| 41 | 1B06C2 | 172000 | 172000 | 1640000 | 1641000 | 172000 | 1640500 | 9.5  |
| 42 | 1B06C3 | 161000 | 161000 | 1780000 | 1730000 | 161000 | 1755000 | 10.9 |
| 43 | 1B06C4 | 179000 | 181000 | 1970000 | 1980000 | 180000 | 1975000 | 11.0 |
| 44 | 1B06C5 | 156000 | 161000 | 1710000 | 1690000 | 158500 | 1700000 | 10.7 |
| 45 | 1B08C1 | 117000 | 119000 | 1210000 | 1230000 | 118000 | 1220000 | 10.3 |
| 46 | 1B08C2 | 101000 | 103000 | 1160000 | 1140000 | 102000 | 1150000 | 11.3 |
| 47 | 1B08C3 | 109000 | 111000 | 1230000 | 1230000 | 110000 | 1230000 | 11.2 |
| 48 | 1B08C4 | 98000  | 98000  | 1010000 | 1020000 | 98000  | 1015000 | 10.4 |
| 49 | 1B08C5 | 114000 | 117000 | 1190000 | 1190000 | 115500 | 1190000 | 10.3 |
| 50 | 1B10C1 | 76000  | 77000  | 890000  | 870000  | 76500  | 880000  | 11.5 |
| 51 | 1B10C2 | 87000  | 87000  | 980000  | 970000  | 87000  | 975000  | 11.2 |
| 52 | 1B10C3 | 65000  | 66000  | 710000  | 690000  | 65500  | 700000  | 10.7 |
| 53 | 1B10C4 | 69000  | 71000  | 980000  | 950000  | 70000  | 965000  | 13.8 |
| 54 | 1B10C5 | 73000  | 73000  | 1010000 | 990000  | 73000  | 1000000 | 13.7 |
| 55 | 1B13C1 | 32000  | 31000  | 540000  | 540000  | 31500  | 540000  | 17.1 |
| 56 | 1B13C2 | 28000  | 28000  | 480000  | 450000  | 28000  | 465000  | 16.6 |
| 57 | 1B13C3 | 29100  | 29000  | 510000  | 500000  | 29050  | 505000  | 17.4 |
| 58 | 1B13C4 | 34000  | 34000  | 650000  | 620000  | 34000  | 635000  | 18.7 |

|    |        |        |        |         |         |        |         |      |
|----|--------|--------|--------|---------|---------|--------|---------|------|
| 59 | 1B13C5 | 27000  | 28000  | 430000  | 440000  | 27500  | 435000  | 15.8 |
| 60 | 1D06C1 | 156000 | 154000 | 1830000 | 1830000 | 155000 | 1830000 | 11.8 |
| 61 | 1D06C2 | 143000 | 145000 | 1630000 | 1630000 | 144000 | 1630000 | 11.3 |
| 62 | 1D06C3 | 149000 | 151000 | 1750000 | 1640000 | 150000 | 1695000 | 11.3 |
| 63 | 1D06C4 | 132000 | 135000 | 1410000 | 1390000 | 133500 | 1400000 | 10.5 |
| 64 | 1D06C5 | 137000 | 137000 | 1210000 | 1200000 | 137000 | 1205000 | 8.8  |
| 65 | 1D08C1 | 117000 | 121000 | 1180000 | 1180000 | 119000 | 1180000 | 9.9  |
| 66 | 1D08C2 | 105000 | 109000 | 1240000 | 1310000 | 107000 | 1275000 | 11.9 |
| 67 | 1D08C3 | 98000  | 98000  | 109000  | 110000  | 98000  | 109500  | 1.1  |
| 68 | 1D08C4 | 89000  | 92000  | 103000  | 100000  | 90500  | 101500  | 1.1  |
| 69 | 1D08C5 | 101000 | 10000  | 980000  | 990000  | 55500  | 985000  | 17.7 |
| 70 | 1D10C1 | 75000  | 73000  | 870000  | 860000  | 74000  | 865000  | 11.7 |
| 71 | 1D10C2 | 67000  | 61000  | 780000  | 820000  | 64000  | 800000  | 12.5 |
| 72 | 1D10C3 | 71000  | 69000  | 820000  | 810000  | 70000  | 815000  | 11.6 |
| 73 | 1D10C4 | 64000  | 65000  | 760000  | 770000  | 64500  | 765000  | 11.9 |
| 74 | 1D10C5 | 69000  | 71000  | 810000  | 850000  | 70000  | 830000  | 11.9 |
| 75 | 1D13C1 | 24000  | 21000  | 390000  | 410000  | 22500  | 400000  | 17.8 |
| 76 | 1D13C2 | 31000  | 34000  | 460000  | 460000  | 32500  | 460000  | 14.2 |
| 77 | 1D13C3 | 29000  | 29000  | 320000  | 310000  | 29000  | 315000  | 10.9 |
| 78 | 1D13C4 | 26000  | 26000  | 290000  | 250000  | 26000  | 270000  | 10.4 |
| 79 | 1C06C1 | 173000 | 177000 | 1980000 | 1980000 | 175000 | 1980000 | 11.3 |
| 80 | 1C06C2 | 182000 | 184000 | 2190000 | 2110000 | 183000 | 2150000 | 11.7 |
| 81 | 1C06C3 | 184000 | 186000 | 2110000 | 2180000 | 185000 | 2145000 | 11.6 |
| 82 | 1C06C4 | 176000 | 179000 | 1870000 | 1870000 | 177500 | 1870000 | 10.5 |
| 83 | 1C06C5 | 183000 | 183000 | 2110000 | 2130000 | 183000 | 2120000 | 11.6 |
| 84 | 1C08C1 | 156000 | 156000 | 1650000 | 1690000 | 156000 | 1670000 | 10.7 |
| 85 | 1C08C2 | 167000 | 161000 | 1430000 | 1440000 | 164000 | 1435000 | 8.8  |
| 86 | 1C08C3 | 152000 | 149000 | 1210000 | 1230000 | 150500 | 1220000 | 8.1  |
| 87 | 1C08C4 | 154000 | 155000 | 1280000 | 1290000 | 154500 | 1285000 | 8.3  |
| 88 | 1C08C5 | 149000 | 151000 | 1210000 | 1220000 | 150000 | 1215000 | 8.1  |
| 89 | 1C10C1 | 132000 | 132000 | 1100000 | 1030000 | 132000 | 1065000 | 8.1  |

|     |        |        |        |         |         |        |         |      |
|-----|--------|--------|--------|---------|---------|--------|---------|------|
| 90  | 1C10C2 | 128000 | 128000 | 1010000 | 1040000 | 128000 | 1025000 | 8.0  |
| 91  | 1C10C3 | 115000 | 121000 | 1090000 | 1080000 | 118000 | 1085000 | 9.2  |
| 92  | 1C10C4 | 124000 | 125000 | 1260000 | 1270000 | 124500 | 1265000 | 10.2 |
| 93  | 1C10C5 | 119000 | 121000 | 1310000 | 1310000 | 120000 | 1310000 | 10.9 |
| 94  | 1C13C1 | 108000 | 109000 | 1170000 | 1140000 | 108500 | 1155000 | 10.6 |
| 95  | 1C13C2 | 111000 | 109000 | 1020000 | 1040000 | 110000 | 1030000 | 9.4  |
| 96  | 1C13C3 | 121000 | 118000 | 1040000 | 1010000 | 119500 | 1025000 | 8.6  |
| 97  | 1C13C4 | 118000 | 118000 | 1110000 | 1090000 | 118000 | 1100000 | 9.3  |
| 98  | 1C13C5 | 117000 | 121000 | 1070000 | 1050000 | 119000 | 1060000 | 8.9  |
| 99  | 1C15C1 | 101000 | 99000  | 1020000 | 1030000 | 100000 | 1025000 | 10.3 |
| 100 | 1C15C2 | 97000  | 91000  | 960000  | 1050000 | 94000  | 1005000 | 10.7 |
| 101 | 1C15C3 | 104000 | 101000 | 1120000 | 1090000 | 102500 | 1105000 | 10.8 |
| 102 | 1G06C1 | 129000 | 125000 | 1350000 | 1370000 | 127000 | 1360000 | 10.7 |
| 103 | 1G06C2 | 135000 | 137000 | 1540000 | 1560000 | 136000 | 1550000 | 11.4 |
| 104 | 1G06C3 | 139000 | 141000 | 1310000 | 1310000 | 140000 | 1310000 | 9.4  |
| 105 | 1G06C4 | 141000 | 143000 | 1270000 | 1270000 | 142000 | 1270000 | 8.9  |
| 106 | 1G06C5 | 134000 | 134000 | 1450000 | 1490000 | 134000 | 1470000 | 11.0 |
| 107 | 1G08C1 | 109000 | 104000 | 1280000 | 1320000 | 106500 | 1300000 | 12.2 |
| 108 | 1G08C2 | 112000 | 117000 | 1290000 | 1290000 | 114500 | 1290000 | 11.3 |
| 109 | 1G08C3 | 125000 | 131000 | 1420000 | 1540000 | 128000 | 1480000 | 11.6 |
| 110 | 1G08C4 | 101000 | 99000  | 1110000 | 1320000 | 100000 | 1215000 | 12.2 |
| 111 | 1G08C5 | 8600   | 8900   | 98000   | 101000  | 8750   | 99500   | 11.4 |
| 112 | 1G10C1 | 1290   | 1260   | 12500   | 13100   | 1275   | 12800   | 10.0 |
| 113 | 1G10C2 | 1200   | 1240   | 11700   | 11900   | 1220   | 11800   | 9.7  |
| 114 | 1G10C3 | 1320   | 1400   | 13800   | 14100   | 1360   | 13950   | 10.3 |
| 115 | 1G10C4 | 1180   | 1150   | 12900   | 13100   | 1165   | 13000   | 11.2 |
| 116 | 1G10C5 | 1200   | 1250   | 13400   | 13500   | 1225   | 13450   | 11.0 |
| 117 | 1G13C1 | 840    | 855    | 8900    | 9100    | 848    | 9000    | 10.6 |
| 118 | 1G13C2 | 815    | 820    | 7200    | 6900    | 818    | 7050    | 8.6  |
| 119 | 1G13C3 | 910    | 890    | 10100   | 9900    | 900    | 10000   | 11.1 |
| 120 | 1G13C4 | 650    | 720    | 9900    | 9400    | 685    | 9650    | 14.1 |

|     |        |        |        |         |         |        |         |      |
|-----|--------|--------|--------|---------|---------|--------|---------|------|
| 121 | 2E06C1 | 182000 | 186000 | 2510000 | 2540000 | 184000 | 2525000 | 13.7 |
| 122 | 2E06C2 | 181000 | 179000 | 2340000 | 2460000 | 180000 | 2400000 | 13.3 |
| 123 | 2E06C3 | 189000 | 188000 | 2350000 | 2350000 | 188500 | 2350000 | 12.5 |
| 124 | 2E06C4 | 173900 | 177000 | 2670000 | 2670000 | 175450 | 2670000 | 15.2 |
| 125 | 2E06C5 | 187000 | 185000 | 2190000 | 2200000 | 186000 | 2195000 | 11.8 |
| 126 | 2E08C1 | 335000 | 331000 | 3179000 | 3180000 | 333000 | 3179500 | 9.5  |
| 127 | 2E08C2 | 321000 | 321000 | 2980000 | 2879000 | 321000 | 2929500 | 9.1  |
| 128 | 2E08C3 | 314500 | 314500 | 2981000 | 2992000 | 314500 | 2986500 | 9.5  |
| 129 | 2E08C4 | 309000 | 307700 | 2850000 | 2850000 | 308350 | 2850000 | 9.2  |
| 130 | 2E08C5 | 327000 | 333000 | 2762000 | 2765000 | 330000 | 2763500 | 8.4  |
| 131 | 2E11C1 | 392000 | 387000 | 3450000 | 3450000 | 389500 | 3450000 | 8.9  |
| 132 | 2E11C2 | 387000 | 389000 | 3440000 | 3440000 | 388000 | 3440000 | 8.9  |
| 133 | 2E11C3 | 377000 | 377000 | 3650000 | 3690000 | 377000 | 3670000 | 9.7  |
| 134 | 2E11C4 | 369000 | 375000 | 3760000 | 3810000 | 372000 | 3785000 | 10.2 |
| 135 | 2E11C5 | 346000 | 452000 | 3860000 | 3910000 | 399000 | 3885000 | 9.7  |
| 136 | 2A06C1 | 181000 | 181000 | 2540000 | 2590000 | 181000 | 2565000 | 14.2 |
| 137 | 2A06C2 | 197000 | 195000 | 2470000 | 2490000 | 196000 | 2480000 | 12.7 |
| 138 | 2A06C3 | 192000 | 194000 | 2360000 | 2330000 | 193000 | 2345000 | 12.2 |
| 139 | 2A06C4 | 186000 | 184000 | 2490000 | 2490000 | 185000 | 2490000 | 13.5 |
| 140 | 2A06C5 | 182000 | 183000 | 2260000 | 2290000 | 182500 | 2275000 | 12.5 |
| 141 | 2A08C1 | 183000 | 182000 | 2380000 | 2310000 | 182500 | 2345000 | 12.8 |
| 142 | 2A08C2 | 178000 | 176000 | 2140000 | 2180000 | 177000 | 2160000 | 12.2 |
| 143 | 2A08C3 | 179000 | 177000 | 2290000 | 2270000 | 178000 | 2280000 | 12.8 |
| 144 | 2A08C4 | 184000 | 183000 | 2190000 | 2170000 | 183500 | 2180000 | 11.9 |
| 145 | 2A08C5 | 178000 | 177000 | 2010000 | 2000000 | 177500 | 2005000 | 11.3 |
| 146 | 2A11C1 | 159000 | 161000 | 1840000 | 1820000 | 160000 | 1830000 | 11.4 |
| 147 | 2A11C2 | 163000 | 162000 | 1790000 | 1780000 | 162500 | 1785000 | 11.0 |
| 148 | 2A11C3 | 156000 | 154000 | 1690000 | 1690000 | 155000 | 1690000 | 10.9 |
| 149 | 2A11C4 | 158000 | 158000 | 1760000 | 1750000 | 158000 | 1755000 | 11.1 |
| 150 | 2A11C5 | 154000 | 155000 | 1670000 | 1680000 | 154500 | 1675000 | 10.8 |
| 151 | 2A13C1 | 114000 | 114000 | 1070000 | 1110000 | 114000 | 1090000 | 9.6  |

|     |        |        |        |         |         |        |         |      |
|-----|--------|--------|--------|---------|---------|--------|---------|------|
| 152 | 2A13C2 | 96000  | 97000  | 199000  | 196000  | 96500  | 197500  | 2.0  |
| 153 | 2A13C3 | 102000 | 104000 | 1180000 | 1140000 | 103000 | 1160000 | 11.3 |
| 154 | 2A13C4 | 95000  | 98000  | 897000  | 894000  | 96500  | 895500  | 9.3  |
| 155 | 2A13C5 | 118000 | 121000 | 1350000 | 1320000 | 119500 | 1335000 | 11.2 |
| 156 | 2A15C1 | 89000  | 87000  | 1010000 | 980000  | 88000  | 995000  | 11.3 |
| 157 | 2B06C1 | 165000 | 168000 | 1580000 | 1570000 | 166500 | 1575000 | 9.5  |
| 158 | 2B06C2 | 169000 | 164000 | 1710000 | 1750000 | 166500 | 1730000 | 10.4 |
| 159 | 2B06C3 | 158000 | 161000 | 1560000 | 1550000 | 159500 | 1555000 | 9.7  |
| 160 | 2B06C4 | 154000 | 158000 | 1750000 | 1770000 | 156000 | 1760000 | 11.3 |
| 161 | 2B06C5 | 163000 | 163000 | 1520000 | 1530000 | 163000 | 1525000 | 9.4  |
| 162 | 2B08C1 | 115000 | 119000 | 1240000 | 1230000 | 117000 | 1235000 | 10.6 |
| 163 | 2B08C2 | 101000 | 104000 | 1150000 | 1170000 | 102500 | 1160000 | 11.3 |
| 164 | 2B08C3 | 108000 | 110000 | 1250000 | 1230000 | 109000 | 1240000 | 11.4 |
| 165 | 2B08C4 | 98000  | 94000  | 1040000 | 1080000 | 96000  | 1060000 | 11.0 |
| 166 | 2B08C5 | 107000 | 107000 | 1230000 | 1270000 | 107000 | 1250000 | 11.7 |
| 167 | 2B11C1 | 69000  | 67000  | 750000  | 790000  | 68000  | 770000  | 11.3 |
| 168 | 2B11C2 | 71000  | 74000  | 840000  | 860000  | 72500  | 850000  | 11.7 |
| 169 | 2B11C3 | 62000  | 62000  | 850000  | 850000  | 62000  | 850000  | 13.7 |
| 170 | 2B11C4 | 68000  | 68000  | 790000  | 770000  | 68000  | 780000  | 11.5 |
| 171 | 2B11C5 | 65000  | 67000  | 860000  | 870000  | 66000  | 865000  | 13.1 |
| 172 | 2D06C1 | 149000 | 151000 | 1740000 | 1750000 | 150000 | 1745000 | 11.6 |
| 173 | 2D06C2 | 148000 | 147000 | 1590000 | 1610000 | 147500 | 1600000 | 10.8 |
| 174 | 2D06C3 | 152000 | 153000 | 1670000 | 1640000 | 152500 | 1655000 | 10.9 |
| 175 | 2D06C4 | 148000 | 145000 | 1520000 | 1490000 | 146500 | 1505000 | 10.3 |
| 176 | 2D06C5 | 149000 | 149000 | 1580000 | 1560000 | 149000 | 1570000 | 10.5 |
| 177 | 2C06C1 | 169000 | 171000 | 1840000 | 1840000 | 170000 | 1840000 | 10.8 |
| 178 | 2C06C2 | 172000 | 173000 | 1970000 | 1940000 | 172500 | 1955000 | 11.3 |
| 179 | 2C06C3 | 165000 | 166000 | 1740000 | 1780000 | 165500 | 1760000 | 10.6 |
| 180 | 2C06C4 | 168000 | 164000 | 1860000 | 1870000 | 166000 | 1865000 | 11.2 |
| 181 | 2C06C5 | 178000 | 177000 | 1910000 | 1870000 | 177500 | 1890000 | 10.6 |
| 182 | 2C08C1 | 152000 | 152000 | 1790000 | 1780000 | 152000 | 1785000 | 11.7 |

|     |        |        |        |         |         |        |         |      |
|-----|--------|--------|--------|---------|---------|--------|---------|------|
| 183 | 2C08C2 | 157000 | 161000 | 1580000 | 1550000 | 159000 | 1565000 | 9.8  |
| 184 | 2C08C3 | 148000 | 151000 | 1380000 | 1350000 | 149500 | 1365000 | 9.1  |
| 185 | 2C08C4 | 149000 | 150000 | 1250000 | 1240000 | 149500 | 1245000 | 8.3  |
| 186 | 2C08C5 | 153000 | 155000 | 1410000 | 1420000 | 154000 | 1415000 | 9.2  |
| 187 | 2C11C1 | 125000 | 127000 | 1130000 | 1130000 | 126000 | 1130000 | 9.0  |
| 188 | 2C11C2 | 132000 | 133000 | 1280000 | 1270000 | 132500 | 1275000 | 9.6  |
| 189 | 2C11C3 | 107000 | 108000 | 1140000 | 1140000 | 107500 | 1140000 | 10.6 |
| 190 | 2C11C4 | 114000 | 115000 | 1320000 | 1330000 | 114500 | 1325000 | 11.6 |
| 191 | 2C11C5 | 116000 | 117000 | 1270000 | 1280000 | 116500 | 1275000 | 10.9 |
| 192 | 2C13C1 | 105000 | 106000 | 1010000 | 1020000 | 105500 | 1015000 | 9.6  |
| 193 | 2C13C2 | 108000 | 111000 | 1050000 | 1040000 | 109500 | 1045000 | 9.5  |
| 194 | 2C13C3 | 112000 | 113000 | 1180000 | 1140000 | 112500 | 1160000 | 10.3 |
| 195 | 2C13C4 | 109000 | 110000 | 1080000 | 1050000 | 109500 | 1065000 | 9.7  |
| 196 | 2C13C5 | 115000 | 116000 | 1100000 | 1110000 | 115500 | 1105000 | 9.6  |
| 197 | 2G06C1 | 188000 | 187000 | 2670000 | 2660000 | 187500 | 2665000 | 14.2 |
| 198 | 2G06C2 | 179000 | 179000 | 2570000 | 2560000 | 179000 | 2565000 | 14.3 |
| 199 | 2G06C3 | 181000 | 180000 | 2240000 | 2250000 | 180500 | 2245000 | 12.4 |
| 200 | 2G06C4 | 186000 | 185000 | 2340000 | 2330000 | 185500 | 2335000 | 12.6 |
| 201 | 2G06C5 | 183000 | 184000 | 2340000 | 2310000 | 183500 | 2325000 | 12.7 |
| 202 | 2G08C1 | 110000 | 108000 | 1070000 | 1060000 | 109000 | 1065000 | 9.8  |
| 203 | 2G08C2 | 102000 | 104000 | 1140000 | 1150000 | 103000 | 1145000 | 11.1 |
| 204 | 2G08C3 | 97000  | 98000  | 1040000 | 1080000 | 97500  | 1060000 | 10.9 |
| 205 | 2G08C4 | 94000  | 95000  | 1060000 | 1070000 | 94500  | 1065000 | 11.3 |
| 206 | 2G08C5 | 101000 | 104000 | 1100000 | 1080000 | 102500 | 1090000 | 10.6 |
| 207 | 2G11C1 | 1100   | 1200   | 15400   | 15500   | 1150   | 15450   | 13.4 |
| 208 | 2G11C2 | 1340   | 1340   | 12700   | 12800   | 1340   | 12750   | 9.5  |
| 209 | 2G11C3 | 1200   | 1200   | 13600   | 13600   | 1200   | 13600   | 11.3 |
| 210 | 2G11C4 | 1290   | 1290   | 11400   | 11500   | 1290   | 11450   | 8.9  |
| 211 | 2G11C5 | 1180   | 1200   | 14700   | 14500   | 1190   | 14600   | 12.3 |
| 212 | 3E06C1 | 179000 | 179000 | 2319000 | 2320000 | 179000 | 2319500 | 13.0 |
| 213 | 3E06C2 | 183000 | 181000 | 2190000 | 2210000 | 182000 | 2200000 | 12.1 |

|     |        |        |        |         |         |        |         |      |
|-----|--------|--------|--------|---------|---------|--------|---------|------|
| 214 | 3E06C3 | 173000 | 177000 | 2350000 | 2350000 | 175000 | 2350000 | 13.4 |
| 215 | 3E06C4 | 189000 | 186000 | 2162000 | 2164000 | 187500 | 2163000 | 11.5 |
| 216 | 3E06C5 | 182000 | 179000 | 2240000 | 2240000 | 180500 | 2240000 | 12.4 |
| 217 | 3E08C1 | 341000 | 337000 | 2650000 | 2710000 | 339000 | 2680000 | 7.9  |
| 218 | 3E08C2 | 356000 | 358100 | 2780000 | 2810000 | 357050 | 2795000 | 7.8  |
| 219 | 3E08C3 | 309000 | 311000 | 2940000 | 2940000 | 310000 | 2940000 | 9.5  |
| 220 | 3E08C4 | 321000 | 321000 | 2990000 | 2910000 | 321000 | 2950000 | 9.2  |
| 221 | 3E08C5 | 337000 | 331000 | 2820000 | 2820000 | 334000 | 2820000 | 8.4  |
| 222 | 3E11C1 | 412000 | 409000 | 3987000 | 3981000 | 410500 | 3984000 | 9.7  |
| 223 | 3A06C1 | 182000 | 183000 | 2280000 | 2290000 | 182500 | 2285000 | 12.5 |
| 224 | 3A06C2 | 194000 | 194000 | 2480000 | 2510000 | 194000 | 2495000 | 12.9 |
| 225 | 3A06C3 | 186000 | 182000 | 2390000 | 2370000 | 184000 | 2380000 | 12.9 |
| 226 | 3A06C4 | 192000 | 191000 | 2590000 | 2550000 | 191500 | 2570000 | 13.4 |
| 227 | 3A06C5 | 179000 | 181000 | 2340000 | 2390000 | 180000 | 2365000 | 13.1 |
| 228 | 3A08C1 | 177000 | 175000 | 2310000 | 2330000 | 176000 | 2320000 | 13.2 |
| 229 | 3A08C2 | 185000 | 184000 | 2240000 | 2220000 | 184500 | 2230000 | 12.1 |
| 230 | 3A08C3 | 177000 | 174000 | 2340000 | 2350000 | 175500 | 2345000 | 13.4 |
| 231 | 3A08C4 | 183000 | 189000 | 2280000 | 2280000 | 186000 | 2280000 | 12.3 |
| 232 | 3A08C5 | 186000 | 184000 | 2210000 | 2190000 | 185000 | 2200000 | 11.9 |
| 233 | 3A11C1 | 155000 | 154000 | 1730000 | 1720000 | 154500 | 1725000 | 11.2 |
| 234 | 3A11C2 | 158000 | 158000 | 1840000 | 1850000 | 158000 | 1845000 | 11.7 |
| 235 | 3A11C3 | 161000 | 159000 | 1720000 | 1750000 | 160000 | 1735000 | 10.8 |
| 236 | 3A11C4 | 153000 | 155000 | 1640000 | 1650000 | 154000 | 1645000 | 10.7 |
| 237 | 3A11C5 | 162000 | 158000 | 1520000 | 1540000 | 160000 | 1530000 | 9.6  |
| 238 | 3A13C1 | 108000 | 105000 | 1190000 | 1150000 | 106500 | 1170000 | 11.0 |
| 239 | 3A13C2 | 104000 | 100000 | 1240000 | 1210000 | 102000 | 1225000 | 12.0 |
| 240 | 3B06C1 | 156000 | 156000 | 1780000 | 1800000 | 156000 | 1790000 | 11.5 |
| 241 | 3B06C2 | 159000 | 154000 | 1690000 | 1680000 | 156500 | 1685000 | 10.8 |
| 242 | 3B06C3 | 155000 | 152000 | 1680000 | 1690000 | 153500 | 1685000 | 11.0 |
| 243 | 3B06C4 | 168000 | 165000 | 1540000 | 1540000 | 166500 | 1540000 | 9.2  |
| 244 | 3B06C5 | 163000 | 163000 | 1520000 | 1530000 | 163000 | 1525000 | 9.4  |



|     |        |        |         |         |         |        |         |      |
|-----|--------|--------|---------|---------|---------|--------|---------|------|
| 245 | 3B08C1 | 119000 | 117000  | 1180000 | 1210000 | 118000 | 1195000 | 10.1 |
| 246 | 3B08C2 | 108000 | 1080000 | 1010000 | 1050000 | 594000 | 1030000 | 1.7  |
| 247 | 3B08C3 | 95000  | 96000   | 1090000 | 1110000 | 95500  | 1100000 | 11.5 |
| 248 | 3B08C4 | 97000  | 99000   | 1050000 | 1080000 | 98000  | 1065000 | 10.9 |
| 249 | 3B08C5 | 99000  | 94000   | 1050000 | 1010000 | 96500  | 1030000 | 10.7 |
| 250 | 3B11C1 | 68000  | 67000   | 750000  | 740000  | 67500  | 745000  | 11.0 |
| 251 | 3B11C2 | 74000  | 73000   | 680000  | 660000  | 73500  | 670000  | 9.1  |
| 252 | 3B11C3 | 79000  | 77000   | 970000  | 960000  | 78000  | 965000  | 12.4 |
| 253 | 3B11C4 | 64000  | 64000   | 820000  | 810000  | 64000  | 815000  | 12.7 |
| 254 | 3B11C5 | 61000  | 61000   | 680000  | 670000  | 61000  | 675000  | 11.1 |
| 255 | 3B13C1 | 54000  | 51000   | 620000  | 630000  | 52500  | 625000  | 11.9 |
| 256 | 3B13C2 | 470000 | 490000  | 540000  | 570000  | 480000 | 555000  | 1.2  |
| 257 | 3D06C1 | 147000 | 146000  | 1780000 | 1760000 | 146500 | 1770000 | 12.1 |
| 258 | 3D06C2 | 154000 | 155000  | 1650000 | 1620000 | 154500 | 1635000 | 10.6 |
| 259 | 3D06C3 | 146000 | 142000  | 1580000 | 1610000 | 144000 | 1595000 | 11.1 |
| 260 | 3D06C4 | 152000 | 150000  | 1420000 | 1440000 | 151000 | 1430000 | 9.5  |
| 261 | 3D06C5 | 145000 | 147000  | 1380000 | 1350000 | 146000 | 1365000 | 9.3  |
| 262 | 3D08C1 | 115000 | 113000  | 1250000 | 1270000 | 114000 | 1260000 | 11.1 |
| 263 | 3D08C2 | 109000 | 111000  | 1170000 | 1130000 | 110000 | 1150000 | 10.5 |
| 264 | 3D08C3 | 102000 | 99000   | 1130000 | 1090000 | 100500 | 1110000 | 11.0 |
| 265 | 3D08C4 | 95000  | 98000   | 1050000 | 1070000 | 96500  | 1060000 | 11.0 |
| 266 | 3D08C5 | 98000  | 98000   | 1010000 | 990000  | 98000  | 1000000 | 10.2 |
| 267 | 3D11C1 | 57000  | 58000   | 710000  | 770000  | 57500  | 740000  | 12.9 |
| 268 | 3C06C1 | 174000 | 169000  | 1780000 | 1770000 | 171500 | 1775000 | 10.3 |
| 269 | 3C06C2 | 165000 | 162000  | 1830000 | 1870000 | 163500 | 1850000 | 11.3 |
| 270 | 3C06C3 | 172000 | 173000  | 1650000 | 1670000 | 172500 | 1660000 | 9.6  |
| 271 | 3C06C4 | 169000 | 167000  | 1720000 | 1720000 | 168000 | 1720000 | 10.2 |
| 272 | 3C06C5 | 164000 | 165000  | 1760000 | 1760000 | 164500 | 1760000 | 10.7 |
| 273 | 3C08C1 | 142000 | 144000  | 1630000 | 1630000 | 143000 | 1630000 | 11.4 |
| 274 | 3C08C2 | 149000 | 147000  | 1710000 | 1710000 | 148000 | 1710000 | 11.6 |
| 275 | 3C08C3 | 153000 | 155000  | 1380000 | 1350000 | 154000 | 1365000 | 8.9  |

|     |        |        |         |         |         |        |         |      |
|-----|--------|--------|---------|---------|---------|--------|---------|------|
| 276 | 3C08C4 | 155000 | 157000  | 1170000 | 1240000 | 156000 | 1205000 | 7.7  |
| 277 | 3C08C5 | 148000 | 148000  | 1340000 | 1350000 | 148000 | 1345000 | 9.1  |
| 278 | 3C11C1 | 128000 | 126000  | 1470000 | 1480000 | 127000 | 1475000 | 11.6 |
| 279 | 3C11C2 | 124000 | 125000  | 1140000 | 1130000 | 124500 | 1135000 | 9.1  |
| 280 | 3C11C3 | 117000 | 118000  | 1240000 | 1240000 | 117500 | 1240000 | 10.6 |
| 281 | 3C11C4 | 121000 | 119000  | 1010000 | 1000000 | 120000 | 1005000 | 8.4  |
| 282 | 3C11C5 | 123000 | 122000  | 1170000 | 1180000 | 122500 | 1175000 | 9.6  |
| 283 | 3C13C1 | 104000 | 103000  | 1210000 | 1190000 | 103500 | 1200000 | 11.6 |
| 284 | 3C13C2 | 105000 | 104000  | 1170000 | 1170000 | 104500 | 1170000 | 11.2 |
| 285 | 3C13C3 | 109000 | 110000  | 1180000 | 1160000 | 109500 | 1170000 | 10.7 |
| 286 | 3C13C4 | 98000  | 99000   | 1040000 | 1050000 | 98500  | 1045000 | 10.6 |
| 287 | 3C13C5 | 101000 | 102000  | 1060000 | 1070000 | 101500 | 1065000 | 10.5 |
| 288 | 3G06C1 | 177000 | 175000  | 2010000 | 1990000 | 176000 | 2000000 | 11.4 |
| 289 | 3G06C2 | 182000 | 183000  | 1870000 | 1880000 | 182500 | 1875000 | 10.3 |
| 290 | 3G06C3 | 175000 | 176000  | 1970000 | 1980000 | 175500 | 1975000 | 11.3 |
| 291 | 3G06C4 | 179000 | 180000  | 1790000 | 1770000 | 179500 | 1780000 | 9.9  |
| 292 | 3G06C5 | 174000 | 178000  | 2010000 | 2040000 | 176000 | 2025000 | 11.5 |
| 293 | 3G08C1 | 104000 | 1050000 | 1150000 | 1170000 | 577000 | 1160000 | 2.0  |
| 294 | 3G08C2 | 96000  | 98000   | 1040000 | 1050000 | 97000  | 1045000 | 10.8 |
| 295 | 3G08C3 | 92000  | 91000   | 1010000 | 990000  | 91500  | 1000000 | 10.9 |
| 296 | 3G08C4 | 98000  | 99000   | 1070000 | 1080000 | 98500  | 1075000 | 10.9 |
| 297 | 3G08C5 | 103000 | 104000  | 1180000 | 1190000 | 103500 | 1185000 | 11.4 |
| 298 | 3G11C1 | 930    | 940     | 11000   | 11500   | 935    | 11250   | 12.0 |
| 299 | 3G11C2 | 1000   | 1050    | 11200   | 12400   | 1025   | 11800   | 11.5 |
| 300 | 3G11C3 | 980    | 990     | 9980    | 9970    | 985    | 9975    | 10.1 |
| 301 | 3G11C4 | 990    | 1000    | 10200   | 10400   | 995    | 10300   | 10.4 |
| 302 | 3G11C5 | 920    | 920     | 9800    | 9700    | 920    | 9750    | 10.6 |
| 303 | 3G13C1 | 850    | 860     | 9600    | 9650    | 855    | 9625    | 11.3 |
| 304 | 3G13C2 | 810    | 820     | 9550    | 9560    | 815    | 9555    | 11.7 |

|     |        |     |     |       |       |     |       |      |
|-----|--------|-----|-----|-------|-------|-----|-------|------|
| 305 | 3G13C3 | 840 | 860 | 9750  | 9700  | 850 | 9725  | 11.4 |
| 306 | 3G13C4 | 910 | 950 | 10500 | 10000 | 930 | 10250 | 11.0 |
